# Supplementary material for: Gut Microbiota Associated with Clostridioides difficile Carriage in Three Clinical Groups (Inflammatory Bowel Disease, C. difficile Infection and Healthcare Workers) in Hospital Field
Source: MDPI journal article supplement (doi:10.3390/microorganisms11102527), 2023-10-10
Supplement: s1 [file s1]

## Supplementary materials

**Table S1.** Identification of patients and patients' information's CDI, IBD and HCW

| Identification | Age  | Sex | T1 | T2 | T3 | ATB Before                      | Treatment for CDI               |
|----------------|------|-----|----|----|----|---------------------------------|---------------------------------|
| CDI patients   |      |     |    |    |    |                                 |                                 |
| <b>CDI 01</b>  | 38 y | F   | X  | X  | NR | No                              | Vancomycin 5d                   |
| <b>CDI 02</b>  | 66 y | F   | X  | X  | X  | No                              | Vancomycin 24h                  |
| <b>CDI 03</b>  | 94 y | M   | X  | D  | D  | NG                              | NG                              |
| <b>CDI 04</b>  | 54 y | M   | X  | X  | X  | No                              | Vancomycin 6d                   |
| <b>CDI 05</b>  | 60 y | F   | X  | X  | X  | Cefuroxim and Ceftriaxon        | No                              |
| <b>CDI 06</b>  | 59 y | F   | X  | X  | X  | No                              | Piperacilline and Tazobactam 7d |
| <b>CDI 07</b>  | 56 y | F   | X  | X  | X  | Cefuroxim                       | Vancomycin 10d                  |
| <b>CDI 08</b>  | 72 y | F   | X  | X  | X  | Moxiflocin                      | Vancomycin 10d                  |
| <b>CDI 09</b>  | 59 y | M   | X  | X  | X  | No                              | Vancomycin 7d                   |
| <b>CDI 10</b>  | 58 y | M   | X  | X  | X  | Ceftriaxon and norfloxacin      | No                              |
| <b>CDI 11</b>  | 66 y | F   | X  | X  | NR | Metronidazole                   | Amoxicillin and clavulanic acid |
| <b>CDI 12</b>  | 66 y | M   | X  | X  | X  | Ceftriaxon and Metronidazole    | No                              |
| <b>CDI 13</b>  | 71 y | F   | X  | X  | X  | Sulfamethozole trimethoprim     | Probiotic                       |
| <b>CDI 14</b>  | 55 y | M   | X  | X  | X  | No                              | Vancomycin                      |
| <b>CDI 15</b>  | 71 y | M   | X  | NR | X  | No                              | Vancomycin 14d                  |
| IBD patients   |      |     |    |    |    |                                 |                                 |
| <b>IBD 01</b>  | 57   | F   | X  | X  | X  | No                              | /                               |
| <b>IBD 02</b>  | 81 y | M   | X  | X  | NR | No                              | /                               |
| <b>IBD 03</b>  | 26 y | F   | X  | NR | X  | No                              | /                               |
| <b>IBD 04</b>  | 57 y | F   | X  | NR | X  | No                              | /                               |
| <b>IBD 05</b>  | 24 y | F   | X  | X  | X  | No                              | /                               |
| <b>IBD 06</b>  | 49 y | F   | X  | X  | X  | ATB 1 month before the donation | /                               |
| <b>IBD 07</b>  | 38 y | F   | X  | NR | X  | No                              | /                               |
| <b>IBD 08</b>  | 42 y | F   | X  | X  | X  | No                              | /                               |
| <b>IBD 09</b>  | 52 y | M   | X  | X  | NR | No                              | /                               |
| <b>IBD 10</b>  | 60 y | F   | X  | X  | X  | No                              | /                               |
| <b>IBD 11</b>  | 30 y | F   | X  | NR | NR | No                              | /                               |

|               |      |   |   |    |    |    |   |
|---------------|------|---|---|----|----|----|---|
| <b>IBD 12</b> | 61 y | F | X | NR | X  | No | / |
| <b>IBD 13</b> | 60 y | F | X | X  | X  | No | / |
| <b>IBD 14</b> | 56 y | M | X | NR | NR | No | / |
| <b>IBD 15</b> | 58 y | F | X | X  | X  | No | / |
| HCW patients  |      |   |   |    |    |    |   |
| <b>HCW 01</b> | 42 y | M | X | X  | X  | No | / |
| <b>HCW 02</b> | 25 y | M | X | X  | X  | No | / |
| <b>HCW 03</b> | 56 y | F | X | X  | X  | No | / |

Legend:

D: deceased; d: days; h: hours; y: years old, F: female; M: male; NR: not realized; NG: not given; red colour: positive sample.

**Table S2.** Classification of faeces with Bristol scale stool and means of preserving the samples

| Samples | T1       |       | T2       |       | T3       |       |
|---------|----------|-------|----------|-------|----------|-------|
|         | Freezing | Scale | Freezing | Scale | Freezing | Scale |
| IBD 01  | No       | 5     | No       | 5     | No       | 5     |
| IBD 02  | No       | 5     | No       | 5     | NR       | NR    |
| IBD 03  | No       | 5     | NR       | NR    | No       | 4     |
| IBD 04  | No       | 3     | NR       | NR    | No       | 4     |
| IBD 05  | No       | 4     | No       | 4     | No       | 4     |
| IBD 06  | No       | 6     | No       | 5     | X        | 6     |
| IBD 07  | No       | 5     | NR       | NR    | No       | 4     |
| IBD 08  | No       | 4     | No       | 4     | No       | 3     |
| IBD 09  | No       | 4     | X        | 4     | NR       | NR    |
| IBD 10  | No       | 4     | No       | 4     | No       | 5     |
| IBD 11  | No       | 4     | NR       | NR    | NR       | NR    |
| IBD 12  | No       | 4     | NR       | NR    | X        | 4     |
| IBD 13  | No       | 3     | X        | 4     | X        | 4     |
| IBD 14  | No       | 5     | NR       | NR    | NR       | NR    |
| IBD 15  | No       | 4     | No       | 4     | X        | 4     |
| PS 01   | No       | 3     | No       | 3     | No       | 3     |
| PS 06   | No       | 4     | No       | 4     | X        | 4     |
| PS 11   | No       | 4     | No       | 4     | X        | 4     |
| CDI 01  | No       | 4     | No       | 5     | NR       | NR    |
| CDI 02  | X        | 6     | X        | 6     | No       | 4     |
| CDI 03  | No       | 4     | NR       | NR    | NR       | NR    |
| CDI 04  | X        | 7     | No       | 7     | X        | 5     |
| CDI 05  | X        | 3     | X        | 5     | No       | 4     |
| CDI 06  | X        | 5     | No       | 4     | X        | 4     |
| CDI 07  | X        | 6     | X        | 5     | No       | 4     |
| CDI 08  | X        | 6     | X        | 5     | No       | 4     |
| CDI 09  | X        | 5     | No       | 5     | X        | 4     |
| CDI 10  | X        | 6     | X        | 4     | X        | 5     |
| CDI 11  | X        | 7     | X        | 7     | NR       | NR    |
| CDI 12  | X        | 5     | X        | 5     | X        | 3     |
| CDI 13  | X        | 5     | No       | 5     | X        | 4     |
| CDI 14  | X        | 6     | X        | 6     | X        | 4     |

|        |   |   |    |    |   |   |
|--------|---|---|----|----|---|---|
| CDI 15 | X | 7 | NR | NR | X | 4 |
|--------|---|---|----|----|---|---|

Legend: X: Freezing; Score: 1 (constipation) to 7 (diarrhoea) (Bristol stool score) and 3 and 4 are normal faeces; NR: not realized; red colour: positive sample.

**Table S3** – Significant taxa using linDA models in R studio v4.2.2 between *C. difficile* positive and *C. difficile* negative group.

|                                             | $\log_2\text{FoldChange}$ | <i>p</i> <sub>adj</sub> |
|---------------------------------------------|---------------------------|-------------------------|
| <i>Clostridioides</i>                       | 3.03878103                | 1.38E-05                |
| <i>Colidextribacter</i>                     | -1.8746591                | 0.0016972               |
| <i>Monoglobus</i>                           | -1.9788814                | 0.0016972               |
| UCG.003                                     | -1.543897                 | 0.00288813              |
| <i>Anaerostipes</i>                         | -2.3853769                | 0.0032462               |
| <i>Enterococcus</i>                         | 3.2322434                 | 0.00376198              |
| <i>Oscilibacter</i>                         | -1.5685798                | 0.00376198              |
| <i>Clostridiales</i> <i>ge</i>              | -1.6838486                | 0.00376198              |
| <i>Lachnospira</i>                          | -2.3245454                | 0.00376198              |
| <i>Oscillospira</i>                         | -1.1121663                | 0.00517723              |
| <i>Butyricicoccus</i>                       | -1.7785305                | 0.00762989              |
| <i>Lachnospiraceae</i> NK4A136 group        | -2.4230547                | 0.0085659               |
| <i>Clostridia</i> <i>ge</i>                 | -1.9161461                | 0.01312289              |
| <i>Enterobacteriales</i> <i>ge</i>          | 1.77432568                | 0.01489544              |
| <i>Sutterella</i>                           | -1.927567                 | 0.01489544              |
| <i>Lachnospiraceae</i> UCG.004              | -1.9382879                | 0.01489544              |
| <i>Romboutsia</i>                           | -2.4449953                | 0.01489544              |
| <i>Oscillospiraceae</i> <i>ge</i>           | -1.5896989                | 0.01716848              |
| <i>Fusicatenibacter</i>                     | -2.6163993                | 0.01716848              |
| <i>Enterobacteriaceae</i> <i>ge</i>         | 2.18702628                | 0.02230039              |
| <i>Haemophilus</i>                          | 0.75252042                | 0.03028035              |
| <i>Coriobacteriales</i> <i>ge</i>           | -1.3208606                | 0.03028035              |
| <i>Lachnospiraceae</i> ND3007 group         | -2.0977945                | 0.03028035              |
| <i>Agathobacter</i>                         | -2.2609146                | 0.03028035              |
| <i>Marvinbryantia</i>                       | -1.1760316                | 0.03480656              |
| <i>Ruminococcaceae</i> <i>ge</i>            | -1.7545244                | 0.03480656              |
| <i>Butyricicoccaceae</i> <i>ge</i>          | -0.7260133                | 0.03513151              |
| <i>Rhodospirillales</i> <i>fa</i> <i>ge</i> | -1.3629844                | 0.04454008              |
| <i>Bilophila</i>                            | 0.84579423                | 0.04778817              |

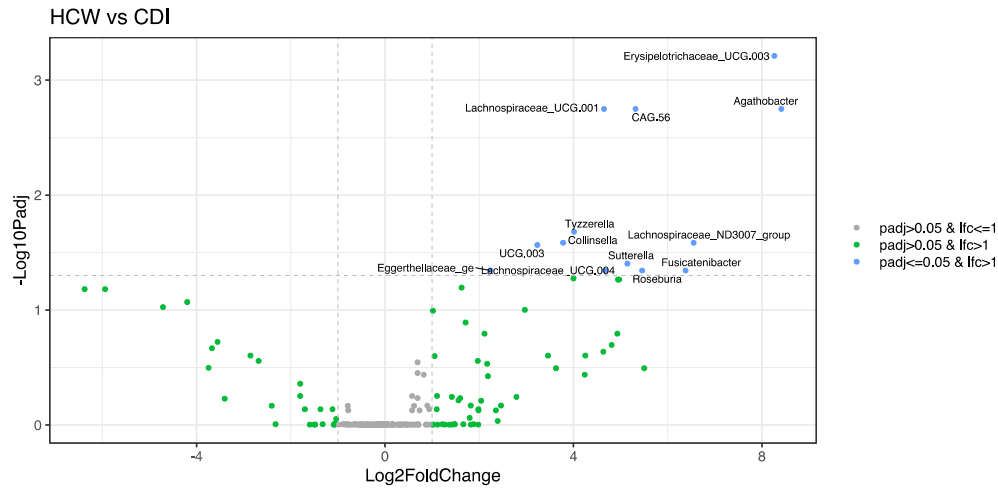

**Figure S1.** Group effect of bacterial microbiota. Linear model for differential abundance in Rstudio v4.2.2 (linDA) using groups and patients as variable. Here a representation of  $\log_2$ fold change of the HCW group between CDI group. Two thresholds are present: The first one is fixed at  $-\log_{10}(\text{padj}) > 0.05$  and the seconde is fixed at -1 and +1  $\log_2$ fold change. The grey dots are the genera with  $\text{padj} > 0.05$  and with an effect size  $\leq 1$ ; the green dots are the genera with  $\text{padj} > 0.05$  and with an effect size  $> 1$ ; the blue dots are the genera with  $\text{padj} \leq 0.05$  and with an effect size  $> 1$ .

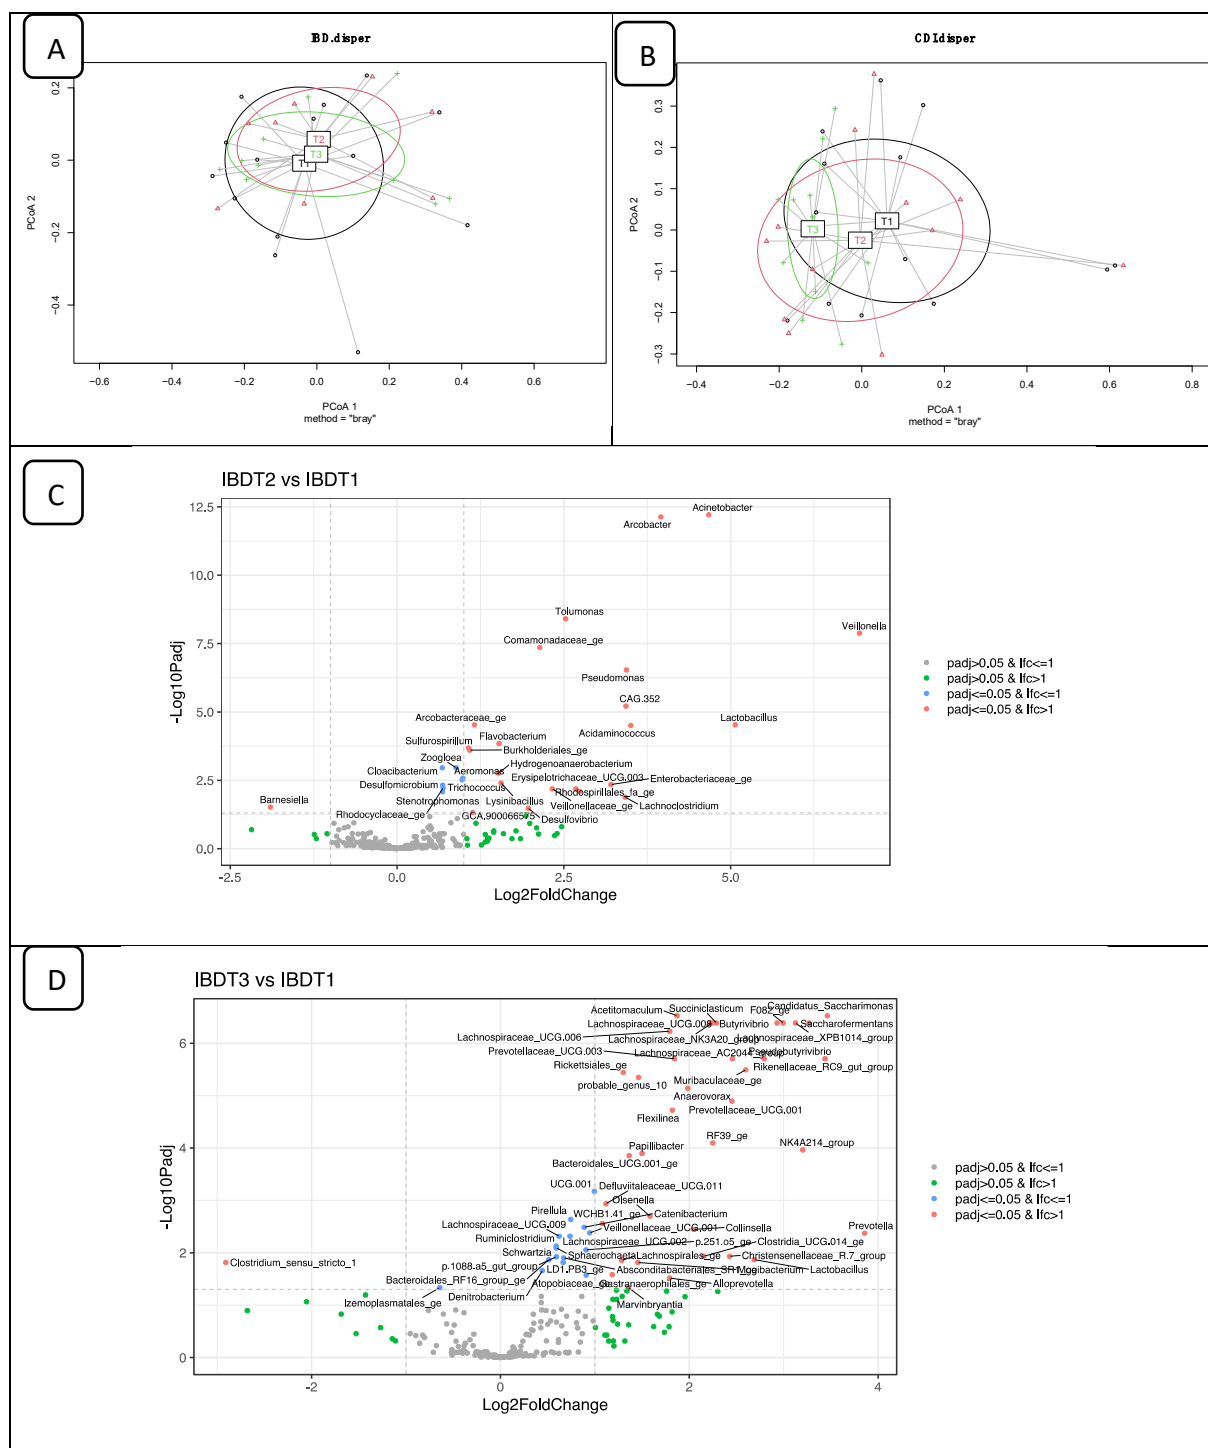

**Figure S2 – Time effect on bacterial microbiota**

Analysis of  $\beta$ -diversity using betadisper with vegan package in Rstudio v4.2.2. Betadisper analyzed beta-dispersion on the basis of Bray-Curtis dissimilarity matrix. Dissimilarity (beta dispersion) between groups was assessed using the Adonis<sub>2</sub> test. IBD time 1 group is represented in black, in IBD time 2 group is represented in red; in IBD time 3 group is represented in green;

Analysis of  $\beta$ -diversity using  $\beta$ -disper in Rstudio v4.2.2. CDI time 1 group is represented in black, in CDI time 2 group is represented in red; in CDI time 3 group is represented in green;

( C ) Linear model for differential abundance in Rstudio v4.2. (linDA) using times and patients as variable for T2 vs T1 in IBD group. Here a representation of  $\log_2$ fold change of the *C. difficile* positive group between *C. difficile* negative group. Two thresholds are present: the first one is fixed at  $-\log_{10}(p_{adj} > 0.05)$  and the second one is fixed at -1 and +1  $\log_2$ fold change. The grey dots are the genera with  $p_{adj} > 0.05$  and with an effect size  $\leq 1$ ; the green dots are the genera with  $p_{adj} > 0.05$  and with an effect size  $> 1$ ; the blue dots are the genera with  $p_{adj} \leq 0.05$  and with an effect size  $\leq 1$  and the red dots are the genera with  $p_{adj} \leq 0.05$  and with an effect size  $> 1$ .

( D ) Linear model for differential abundance in Rstudio v4.2. (linDA) using times and patients as variable for T3 vs T1 in IBD group. Here a representation of  $\log_2$ fold change of the *C. difficile* positive group between *C. difficile* negative group. Two thresholds are present: the first one is fixed at  $-\log_{10}(p_{adj} > 0.05)$  and the second one is fixed at -1 and +1  $\log_2$ fold change. The grey dots are the genera with  $p_{adj} > 0.05$  and with an effect size  $\leq 1$ ; the green dots are the genera with  $p_{adj} > 0.05$  and with an effect size  $> 1$ ; the blue dots are the genera with  $p_{adj} \leq 0.05$  and with an effect size  $\leq 1$  and the red dots are the genera with  $p_{adj} \leq 0.05$  and with an effect size  $> 1$ .



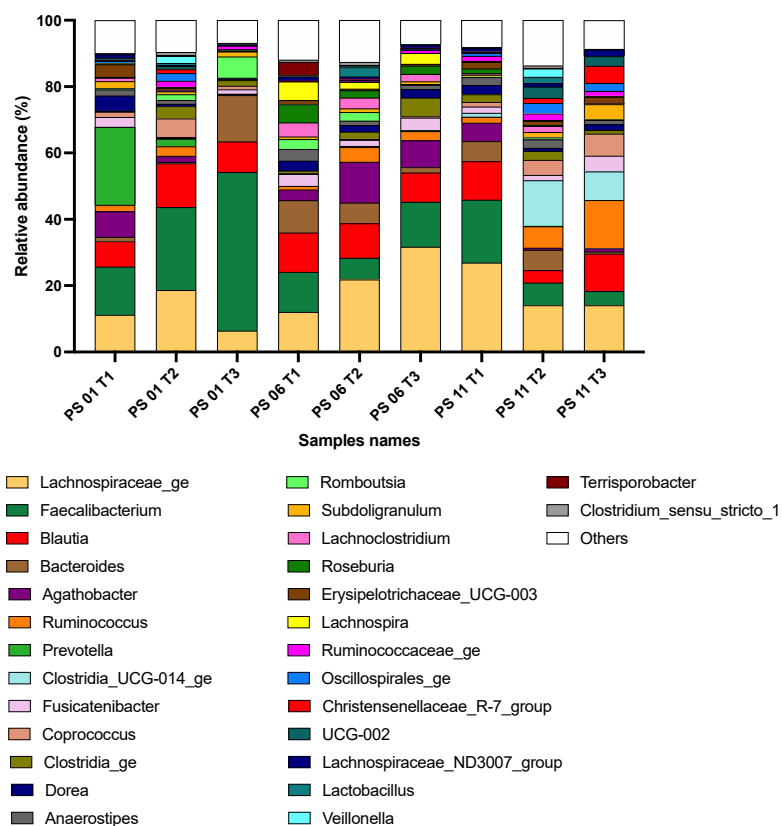

**Figure S3** – Evolution of gut microbiota (mean cumulative relative abundance) of bacterial genera for clinical group through time in HCW groups

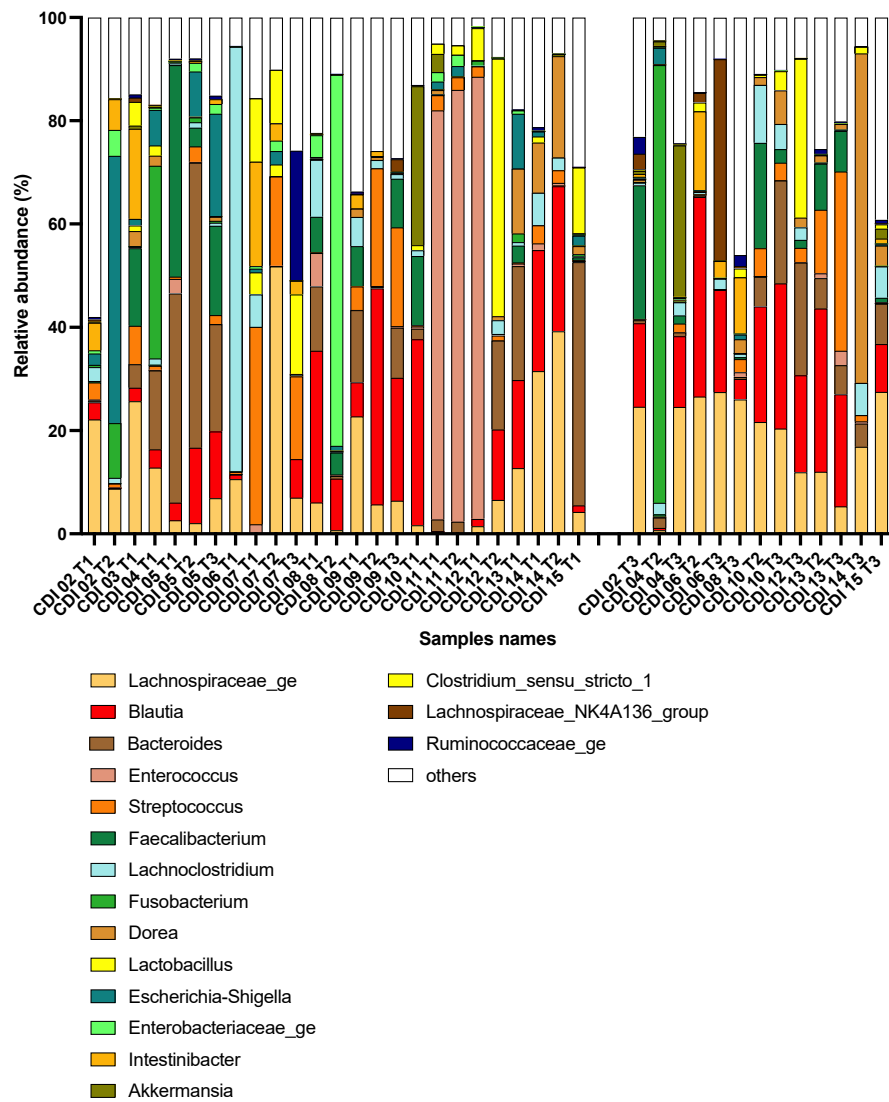

**Figure S4** – Evolution of gut microbiota (mean cumulative relative abundance) of bacterial genera for clinical group through time in CDI groups

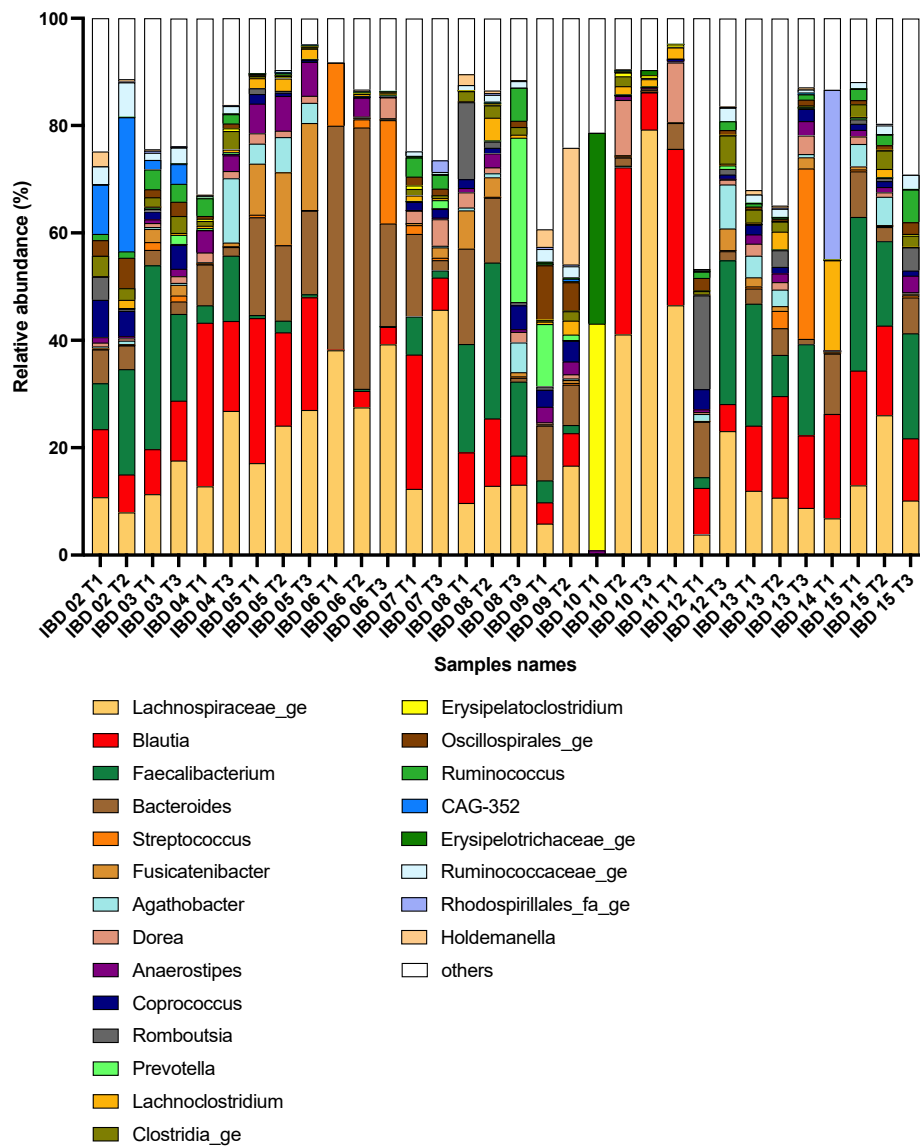

**Figure S5** – Evolution of gut microbiota (mean cumulative relative abundance) of bacterial genera for clinical group through time in IBD groups

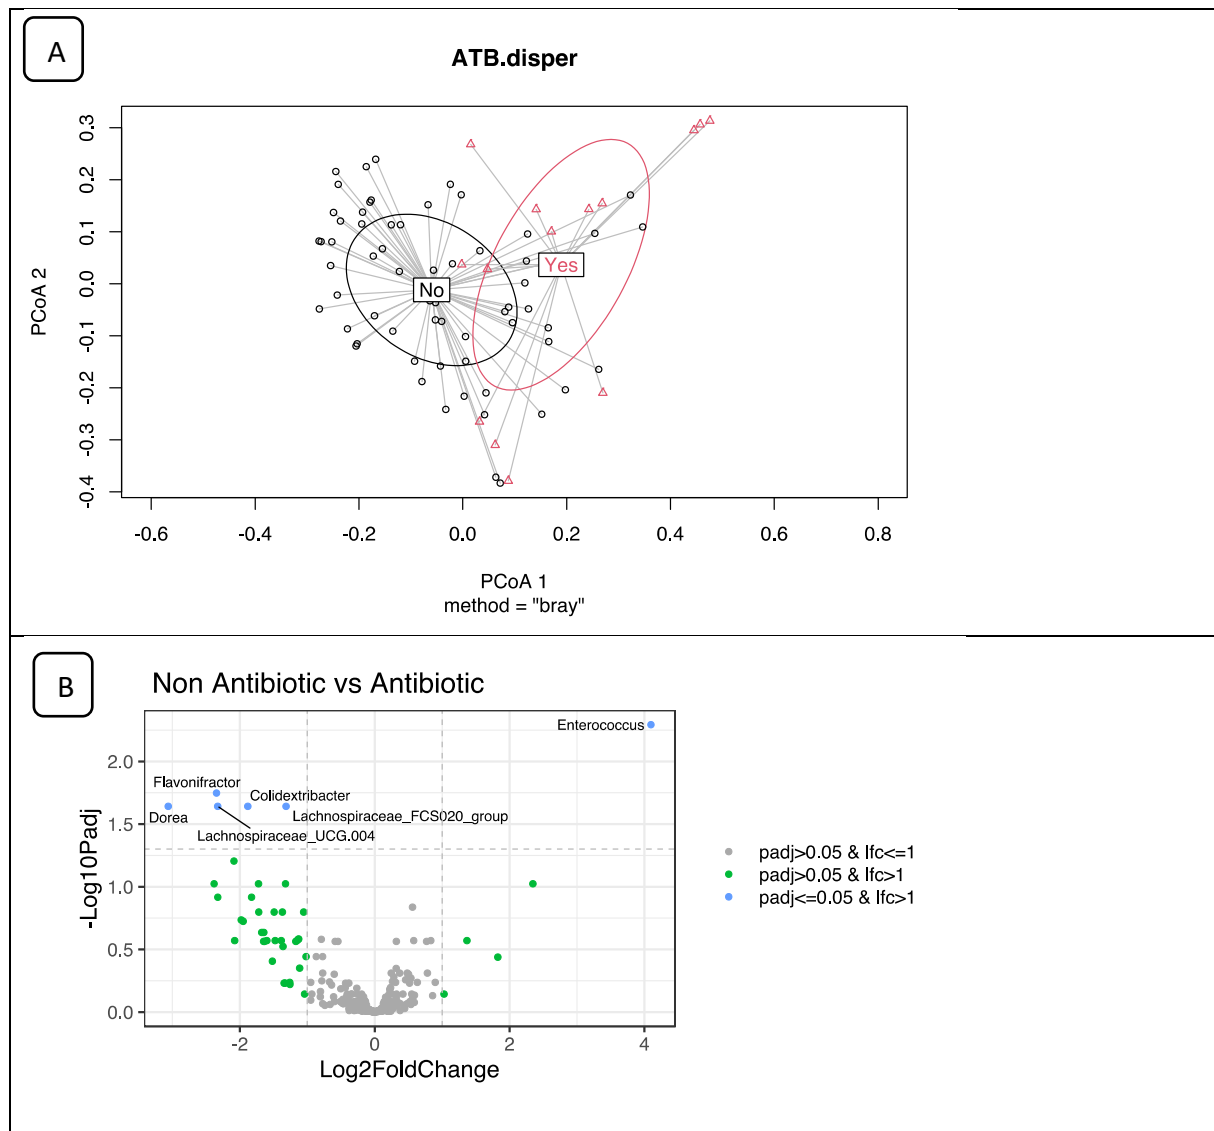

**Figure S6** – Antibiotic effect on bacterial microbiota

- (A) Analysis of  $\beta$ -diversity using betadisper in Rstudio v4.2.2. Betadisper analyzed beta-dispersion on the basis of Bray-Curtis dissimilarity matrix. Dissimilarity (beta dispersion) between groups was assessed using the Adonis<sub>2</sub> test. No-antibiotic used group is represented in black, Antibiotic group is represented in red ( $P$  value = 0.01331)
- (B) Linear model for differential abundance in Rstudio v4.2. (linDA) using antibiotic used and patients as variable. Here a representation of log<sub>2</sub>fold change of the antibiotic used group between non antibiotic group. Two thresholds are present: the first one is fixed at  $-\log_{10}(padj > 0.05)$  and the second one is fixed at -1 and +1 log<sub>2</sub>fold change. The grey dots are the genera with  $padj > 0.05$  and with an effect size  $\leq 1$ ; the green dots are the genera with  $padj > 0.05$  and with an effect size  $> 1$  and the blue dots are the genera with  $padj \leq 0.05$  and with an effect size  $\leq 1$ .
